# Supplementary material
Source: MDPI journal article supplement (https://www.mdpi.com/2073-4441/13/11/1501)
Supplement: s1 [file s1]

**Table S1.** Water quality parameter values after sample analysis at each tree age of the model (in the rainy season)

| ASS   | Sites | Model              | pH   | DO<br>(mg L <sup>-1</sup> ) | EC<br>(μS cm <sup>-1</sup> ) | COD<br>(mg L <sup>-1</sup> ) | BOD<br>(mg L <sup>-1</sup> ) | N-NO <sub>3</sub> <sup>-</sup><br>(mg L <sup>-1</sup> ) | N-NH <sub>4</sub> <sup>+</sup><br>(mg L <sup>-1</sup> ) | Fe <sup>3+</sup><br>(mg L <sup>-1</sup> ) | Al <sup>3+</sup><br>(mg L <sup>-1</sup> ) |
|-------|-------|--------------------|------|-----------------------------|------------------------------|------------------------------|------------------------------|---------------------------------------------------------|---------------------------------------------------------|-------------------------------------------|-------------------------------------------|
| D-ASS | PS.1  | AH > 3 years old   | 6.65 | 1.02                        | 10.48                        | 152                          | 58.0                         | 59.6                                                    | 3.9                                                     | 3.4                                       | 0.2                                       |
|       | PS.2  |                    | 6.35 | 1.45                        | 10.19                        | 223                          | 47.2                         | 20.9                                                    | 1.7                                                     | 2.7                                       | 1.18                                      |
|       | PS.3  |                    | 6.43 | 1.44                        | 10.26                        | 109                          | 57.2                         | 1.0                                                     | 1.6                                                     | 11.5                                      | 0.24                                      |
|       | PS.4  | AH < 3 years old   | 6.86 | 5.35                        | 13.3                         | 77.6                         | 57.2                         | 27.6                                                    | 1.8                                                     | 20.6                                      | 0.11                                      |
|       | PS.5  |                    | 7.34 | 5.96                        | 13.15                        | 74.2                         | 50.4                         | 37.6                                                    | 1.2                                                     | 7.3                                       | 0.15                                      |
|       | PS.6  |                    | 7.38 | 3.04                        | 12.92                        | 78                           | 55.2                         | 26.5                                                    | 2.3                                                     | 10.8                                      | 0.18                                      |
|       | PS.7  | PMC < 5 years old  | 6.63 | 1.87                        | 12.49                        | 67.4                         | 74.4                         | 21.5                                                    | 2.0                                                     | 8.2                                       | 0.28                                      |
|       | PS.8  |                    | 6.46 | 2.06                        | 13.73                        | 53                           | 48.4                         | 25.3                                                    | 0.3                                                     | 28.0                                      | 0.37                                      |
|       | PS.9  |                    | 6.54 | 1.91                        | 14.58                        | 67.6                         | 42.0                         | 1.3                                                     | 4.0                                                     | 35.5                                      | 0.42                                      |
|       | PS.10 | PMC > 5 years old  | 2.63 | 1.82                        | 37.5                         | 220                          | 48.0                         | 28.6                                                    | 1.8                                                     | 26.1                                      | 14.59                                     |
|       | PS.11 |                    | 2.64 | 2.05                        | 36.7                         | 207                          | 52.4                         | 31.8                                                    | 0.5                                                     | 24.6                                      | 18.18                                     |
|       | PS.12 |                    | 2.76 | 2.39                        | 38.3                         | 138                          | 49.6                         | 10.4                                                    | 1.6                                                     | 12.0                                      | 14.46                                     |
|       | PS.13 | NMC > 10 years old | 5.79 | 0.59                        | 1.563                        | 342                          | 52.0                         | 7.8                                                     | 2.8                                                     | 5.2                                       | 1.69                                      |
|       | PS.14 |                    | 5.78 | 0.74                        | 1.755                        | 134                          | 57.6                         | 33.7                                                    | 3.5                                                     | 6.6                                       | 1.93                                      |
|       | PS.15 |                    | 5.92 | 0.63                        | 1.717                        | 370                          | 53.6                         | 4.0                                                     | 1.8                                                     | 5.6                                       | 1.86                                      |
| S-ASS | PN.1  | AH > 3 years old   | 3.4  | 2.39                        | 35.4                         | 370                          | 44.4                         | 20.8                                                    | 2.6                                                     | 19.3                                      | 9.57                                      |
|       | PN.2  |                    | 3.22 | 3.53                        | 19.05                        | 43.4                         | 52.4                         | 20.5                                                    | 3.7                                                     | 26.6                                      | 0.37                                      |
|       | PN.3  |                    | 3.21 | 3.36                        | 14.22                        | 22.4                         | 46.0                         | 7.0                                                     | 2.9                                                     | 35.3                                      | 18.47                                     |
|       | PN.4  | AH < 3 years old   | 3.15 | 2.92                        | 36.4                         | 148                          | 54.4                         | 44.1                                                    | 2.8                                                     | 10.7                                      | 8.91                                      |
|       | PN.5  |                    | 2.31 | 2.11                        | 18.3                         | 51.8                         | 48.0                         | 16.0                                                    | 2.6                                                     | 63.4                                      | 2.04                                      |
|       | PN.6  |                    | 2.28 | 1.1                         | 18.4                         | 47.8                         | 49.6                         | 20.9                                                    | 3.4                                                     | 55.7                                      | 1.16                                      |
|       | PN.7  | PMC < 5 years old  | 2.2  | 2.3                         | 19.9                         | 45.8                         | 52.1                         | 30.8                                                    | 2.7                                                     | 45.7                                      | 1.73                                      |
|       | PN.8  |                    | 2.28 | 2.65                        | 20.38                        | 178                          | 53.6                         | 30.4                                                    | 1.4                                                     | 4.9                                       | 0.31                                      |
|       | PN.9  |                    | 2.28 | 2.54                        | 20.01                        | 38.6                         | 50.0                         | 22.6                                                    | 1.1                                                     | 36.5                                      | 1.86                                      |
|       | PN.10 | PMC > 5 years old  | 3.45 | 2.54                        | 35.7                         | 304                          | 41.2                         | 34.6                                                    | 2.8                                                     | 30.7                                      | 14.3                                      |
|       | PN.11 |                    | 3.42 | 3.35                        | 35.5                         | 248                          | 44.0                         | 3.0                                                     | 2.7                                                     | 20.6                                      | 17.09                                     |
|       | PN.12 |                    | 3.35 | 2.06                        | 34.2                         | 229                          | 49.2                         | 19.6                                                    | 3.4                                                     | 35.3                                      | 1.2                                       |

|       |                    |      |      |       |     |      |      |     |      |      |
|-------|--------------------|------|------|-------|-----|------|------|-----|------|------|
| PN.13 |                    | 5.78 | 0.98 | 1.941 | 390 | 58.4 | 42.8 | 1.6 | 5.5  | 2.1  |
| PN.14 | NMC > 10 years old | 5.82 | 0.73 | 1.943 | 336 | 60.0 | 3.2  | 1.9 | 10.3 | 1.47 |
| PN.15 |                    | 5.75 | 0.78 | 1.931 | 439 | 66.8 | 38.9 | 2.5 | 6.2  | 2.43 |

**Table S2.** Water quality parameter values after sample analysis at each tree age of the model (in the dry season)

| ASS   | Sites | Model              | pH   | DO<br>(mg L <sup>-1</sup> ) | EC<br>(μS cm <sup>-1</sup> ) | COD<br>(mg L <sup>-1</sup> ) | BOD<br>(mg L <sup>-1</sup> ) | N-NO <sub>3</sub> <sup>-</sup><br>(mg L <sup>-1</sup> ) | N-NH <sub>4</sub> <sup>+</sup><br>(mg L <sup>-1</sup> ) | Fe <sup>3+</sup><br>(mg L <sup>-1</sup> ) | Al <sup>3+</sup><br>(mg L <sup>-1</sup> ) |
|-------|-------|--------------------|------|-----------------------------|------------------------------|------------------------------|------------------------------|---------------------------------------------------------|---------------------------------------------------------|-------------------------------------------|-------------------------------------------|
| D-ASS | PS.1  | AH > 3 years old   | 7.13 | 2.8                         | 1.89                         | 128.32                       | 8.00                         | 0.25                                                    | 0.46                                                    | 2.13                                      | 0.07                                      |
|       | PS.2  |                    | 7.2  | 2.9                         | 1.88                         | 106.56                       | 15.90                        | 0.25                                                    | 0.62                                                    | 0.08                                      | 0.64                                      |
|       | PS.3  |                    | 7.13 | 2.9                         | 1.87                         | 123.84                       | 18.00                        | 0.29                                                    | 0.52                                                    | 0.13                                      | 0.08                                      |
|       | PS.4  | AH < 3 years old   | 7.18 | 2.9                         | 1.61                         | 93.76                        | 13.80                        | 4.27                                                    | 0.54                                                    | 1.27                                      | 0.24                                      |
|       | PS.5  |                    | 7.37 | 2.8                         | 1.61                         | 87.04                        | 8.40                         | 0.14                                                    | 0.22                                                    | 1.48                                      | 0.02                                      |
|       | PS.6  |                    | 8.04 | 2.6                         | 1.61                         | 85.76                        | 9.00                         | 6.86                                                    | 0.35                                                    | 0.84                                      | 0.16                                      |
|       | PS.7  | PMC < 5 years old  | 7.35 | 2.5                         | 1.82                         | 117.76                       | 9.20                         | 0.22                                                    | 0.23                                                    | 3.74                                      | 0.09                                      |
|       | PS.8  |                    | 7.39 | 2.8                         | 1.8                          | 106.24                       | 8.00                         | 0.24                                                    | 0.36                                                    | 4.06                                      | 0.16                                      |
|       | PS.9  |                    | 7.22 | 2.8                         | 1.79                         | 127.68                       | 18.40                        | 0.25                                                    | 0.23                                                    | 1.48                                      | 0.24                                      |
|       | PS.10 | PMC > 5 years old  | 2.81 | 3                           | 3.5                          | 139.2                        | 5.20                         | 0.07                                                    | 2.08                                                    | 0.93                                      | 23.77                                     |
|       | PS.11 |                    | 2.87 | 3.1                         | 3.49                         | 135.68                       | 8.00                         | 0.05                                                    | 1.57                                                    | 1.23                                      | 21.95                                     |
|       | PS.12 |                    | 3    | 3.2                         | 3.35                         | 138.4                        | 8.40                         | 0.05                                                    | 1.46                                                    | 1.03                                      | 15.57                                     |
|       | PS.13 | NMC > 10 years old | 4.85 | 1.93                        | 0.98                         | 95.65                        | 13.29                        | 3.85                                                    | 1.98                                                    | 8.67                                      | 3.20                                      |
|       | PS.14 |                    | 4.83 | 1.75                        | 0.95                         | 82.35                        | 14.40                        | 3.19                                                    | 2.15                                                    | 8.36                                      | 3.00                                      |
|       | PS.15 |                    | 4.83 | 1.57                        | 0.91                         | 69.05                        | 15.50                        | 2.54                                                    | 2.32                                                    | 8.05                                      | 2.81                                      |
| S-ASS | PN.1  | A: > 3 years old   | 2.39 | 3                           | 3.53                         | 137.92                       | 4.00                         | 1.96                                                    | 2.20                                                    | 24.25                                     | 27.40                                     |
|       | PN.2  |                    | 2.6  | 2.4                         | 3.11                         | 97.6                         | 2.00                         | 0.45                                                    | 2.33                                                    | 16.41                                     | 0.57                                      |
|       | PN.3  |                    | 2.46 | 2.8                         | 3.59                         | 141.12                       | 9.20                         | 3.84                                                    | 2.11                                                    | 24.95                                     | 27.51                                     |
|       | PN.4  | AH < 3 years old   | 2.39 | 2.4                         | 2.41                         | 53.76                        | 3.60                         | 0.68                                                    | 2.54                                                    | 33.40                                     | 4.58                                      |
|       | PN.5  |                    | 2.43 | 2.1                         | 2.28                         | 114.24                       | 3.20                         | 0.60                                                    | 2.52                                                    | 29.98                                     | 3.72                                      |
|       | PN.6  |                    | 2.42 | 2.2                         | 2.21                         | 52.8                         | 1.20                         | 0.83                                                    | 2.59                                                    | 31.09                                     | 26.37                                     |
|       | PN.7  | PMC < 5 years old  | 2.4  | 2                           | 2.83                         | 335.2                        | 18.40                        | 1.43                                                    | 10.94                                                   | 681.40                                    | 25.39                                     |
|       | PN.8  |                    | 2.38 | 2                           | 2.56                         | 164.8                        | 17.40                        | 0.68                                                    | 26.91                                                   | 263.98                                    | 14.70                                     |
|       | PN.9  |                    | 2.4  | 2.3                         | 2.59                         | 106.4                        | 6.40                         | 1.28                                                    | 6.18                                                    | 154.60                                    | 11.81                                     |
|       | PN.10 | PMC > 5 years old  | 2.53 | 2.3                         | 3.2                          | 86.4                         | 1.60                         | 0.83                                                    | 2.31                                                    | 13.70                                     | 0.57                                      |
|       | PN.11 |                    | 2.4  | 2.6                         | 3.55                         | 81.6                         | 2.80                         | 0.75                                                    | 2.09                                                    | 25.36                                     | 27.47                                     |
|       | PN.12 |                    | 2.4  | 2.5                         | 3.58                         | 140.48                       | 6.80                         | 0.38                                                    | 2.70                                                    | 21.84                                     | 27.27                                     |

|       |                    |      |      |      |        |       |      |      |       |      |
|-------|--------------------|------|------|------|--------|-------|------|------|-------|------|
| PN.13 |                    | 4.89 | 3.62 | 1.25 | 126.88 | 10.87 | 2.75 | 1.81 | 7.89  | 4.77 |
| PN.14 | NMC > 10 years old | 4.78 | 3.05 | 1.15 | 128.81 | 13.75 | 2.35 | 2.53 | 9.38  | 3.85 |
| PN.15 |                    | 4.68 | 2.48 | 1.05 | 130.75 | 16.63 | 1.96 | 3.25 | 10.87 | 2.93 |
